# Supplementary material for: Liverworts show a globally consistent mid‐elevation richness peak
Source: Ecol Evol. 2023 Mar 23;13(3):e9862. doi: 10.1002/ece3.9862 (PMC10034488; doi:10.1002/ece3.9862)
Supplement: Supplementary file 1 — Appendix S1 [file ECE3-13-e9862-s001.pdf]

841 **Appendix 1.** Liverwort species records and plot information of the 3 transects Expedition to Papua New Guinea. YMW, Yu-Mei Wei; MN, Martin Nebel. A total of 24 plots between 200 and  
842 3700 m with 500 m elevational distance in between the sites were established. Eight subplots of 20 x 30 cm<sup>2</sup> each, two for each of four microhabitats (soil, rotten logs, tree trunks above 1  
843 m, and tree branches from 2 to 4 m) were sampled in each plot, additional habitats (e.g., twigs, lianas, shrubs, small trees, tree bases etc.) were sampled outside the subplots across the  
844 entire plot, in order to capture the plot inventory as complete as possible.  
845 Description of the study sites can be found in Leponce, M. et al. 2016. Land module of Our Planet Reviewed–Papua New Guinea: aims, methods and first taxonomical results. - In: Insects of  
846 Mount Wilhelm, Papua New Guinea. Muséum national d'Histoire naturelle, Paris, pp. 573.  
847

| 8 Plot |                                                                    | 1 | 2 | 3 | 4 | 5 | 6 | 7 | 8 | 9 | 10 | 11 | 12 | 13 | 14 | 15 | 16 | 17 | 18 | 19 | 20 | 21 | 22 | 23 | 24 |
|--------|--------------------------------------------------------------------|---|---|---|---|---|---|---|---|---|----|----|----|----|----|----|----|----|----|----|----|----|----|----|----|
| 9      |                                                                    |   |   |   |   |   |   |   |   |   |    |    |    |    |    |    |    |    |    |    |    |    |    |    |    |
| 10     | Latitude                                                           |   |   |   |   |   |   |   |   |   |    |    |    |    |    |    |    |    |    |    |    |    |    |    |    |
| 11     |                                                                    |   |   |   |   |   |   |   |   |   |    |    |    |    |    |    |    |    |    |    |    |    |    |    |    |
| 12     |                                                                    |   |   |   |   |   |   |   |   |   |    |    |    |    |    |    |    |    |    |    |    |    |    |    |    |
| 13     | Longitude                                                          |   |   |   |   |   |   |   |   |   |    |    |    |    |    |    |    |    |    |    |    |    |    |    |    |
| 14     |                                                                    |   |   |   |   |   |   |   |   |   |    |    |    |    |    |    |    |    |    |    |    |    |    |    |    |
| 15     |                                                                    |   |   |   |   |   |   |   |   |   |    |    |    |    |    |    |    |    |    |    |    |    |    |    |    |
| 16     |                                                                    |   |   |   |   |   |   |   |   |   |    |    |    |    |    |    |    |    |    |    |    |    |    |    |    |
| 17     | Date of collection                                                 |   |   |   |   |   |   |   |   |   |    |    |    |    |    |    |    |    |    |    |    |    |    |    |    |
| 18     |                                                                    |   |   |   |   |   |   |   |   |   |    |    |    |    |    |    |    |    |    |    |    |    |    |    |    |
| 19     |                                                                    |   |   |   |   |   |   |   |   |   |    |    |    |    |    |    |    |    |    |    |    |    |    |    |    |
| 20     | Exposition                                                         |   |   |   |   |   |   |   |   |   |    |    |    |    |    |    |    |    |    |    |    |    |    |    |    |
| 21     | Inclination [°]                                                    |   |   |   |   |   |   |   |   |   |    |    |    |    |    |    |    |    |    |    |    |    |    |    |    |
| 22     | Altitude [m.a.s.l.]                                                |   |   |   |   |   |   |   |   |   |    |    |    |    |    |    |    |    |    |    |    |    |    |    |    |
| 23     |                                                                    |   |   |   |   |   |   |   |   |   |    |    |    |    |    |    |    |    |    |    |    |    |    |    |    |
| 24     | <i>Acrobolbus ciliatus</i> (Mitt.) Schiffn.                        |   |   |   |   |   |   |   |   |   |    |    |    |    |    |    |    |    |    |    |    |    |    |    |    |
| 25     | <i>Acrolejeunea pycnoclada</i> (Taylor) Schiffn.                   |   |   |   |   |   |   |   |   |   |    |    |    |    |    |    |    |    |    |    |    |    |    |    |    |
| 26     | <i>Acromastigium bancanum</i> (Sande Lac.) A. Evans                |   |   |   |   |   |   |   |   |   |    |    |    |    |    |    |    |    |    |    |    |    |    |    |    |
| 27     | <i>Acromastigium divaricatum</i> (Nees) A. Evans ex Reimers        |   |   |   |   |   |   |   |   |   |    |    |    |    |    |    |    |    |    |    |    |    |    |    |    |
| 28     | <i>Acromastigium echinatifforme</i> (De Not.) A. Evans             |   |   |   |   |   |   |   |   |   |    |    |    |    |    |    |    |    |    |    |    |    |    |    |    |
| 29     | <i>Acromastigium</i> sp.                                           |   |   |   |   |   |   |   |   |   |    |    |    |    |    |    |    |    |    |    |    |    |    |    |    |
| 30     | <i>Anastrophyllum piligerum</i> (Nees) Steph.                      |   |   |   |   |   |   |   |   |   |    |    |    |    |    |    |    |    |    |    |    |    |    |    |    |
| 31     | <i>Anastrophyllum squarrosum</i> Herzog                            |   |   |   |   |   |   |   |   |   |    |    |    |    |    |    |    |    |    |    |    |    |    |    |    |
| 32     | <i>Andrewsianthus</i> sp.                                          |   |   |   |   |   |   |   |   |   |    |    |    |    |    |    |    |    |    |    |    |    |    |    |    |
| 33     | <i>Aneura giangena</i> Hewson                                      |   |   |   |   |   |   |   |   |   |    |    |    |    |    |    |    |    |    |    |    |    |    |    |    |
| 34     | <i>Aneura kaguaensis</i> Hewson                                    |   |   |   |   |   |   |   |   |   |    |    |    |    |    |    |    |    |    |    |    |    |    |    |    |
| 35     | <i>Aneura novoguineensis</i> Hewson                                |   |   |   |   |   |   |   |   |   |    |    |    |    |    |    |    |    |    |    |    |    |    |    |    |
| 36     | <i>Aneura</i> sp.                                                  |   |   |   |   |   |   |   |   |   |    |    |    |    |    |    |    |    |    |    |    |    |    |    |    |
| 37     | <i>Balantiopsis ciliaris</i> var. <i>novoguineensis</i> S. Hatt.   |   |   |   |   |   |   |   |   |   |    |    |    |    |    |    |    |    |    |    |    |    |    |    |    |
| 38     | <i>Bazzania asymmetrica</i> (Steph.) N. Kitag.                     |   |   |   |   |   |   |   |   |   |    |    |    |    |    |    |    |    |    |    |    |    |    |    |    |
| 39     | <i>Bazzania</i> cf. <i>manillana</i> (Gottsche ex Steph.) S. Hatt. |   |   |   |   |   |   |   |   |   |    |    |    |    |    |    |    |    |    |    |    |    |    |    |    |
| 40     | <i>Bazzania densa</i> (Sande Lac.) Schiffn.                        |   |   |   |   |   |   |   |   |   |    |    |    |    |    |    |    |    |    |    |    |    |    |    |    |
| 41     | <i>Bazzania erosa</i> (Reinw., Blume & Nees) Trevis.               |   |   |   |   |   |   |   |   |   |    |    |    |    |    |    |    |    |    |    |    |    |    |    |    |
| 42     | <i>Bazzania gedeana</i> (Steph.) Meijer                            |   |   |   |   |   |   |   |   |   |    |    |    |    |    |    |    |    |    |    |    |    |    |    |    |
| 43     | <i>Bazzania intermedia</i> (Gottsche & Lindenb.) Trevis.           |   |   |   |   |   |   |   |   |   |    |    |    |    |    |    |    |    |    |    |    |    |    |    |    |

















[illegible]
